# Supplementary material for: Defining adolescent common mental disorders using electronic primary care data: a comparison with outcomes measured using the CIS-R
Source: PubMed Central journal article supplement (PMC5168670; doi:10.1136/bmjopen-2016-013167), 2016-12-01
Supplement: bmjopen-2016-013167supp_table.pdf [file bmjopen-2016-013167supp_table.pdf]

## Supplementary Table 1: Depression and CMD Read codes (version 2) used in case definitions

### ***Depression diagnoses***

Eu32. [X]Depressive episode  
Eu320 [X]Mild depressive episode  
Eu321 [X]Moderate depressive episode  
Eu322 [X]Severe depressive episode without psychotic symptoms  
Eu324 [X]Mild depression  
Eu32y [X]Other depressive episodes  
Eu32z [X]Depressive episode, unspecified  
Eu33. [X]Recurrent depressive disorder  
Eu330 [X]Recurrent depressive disorder, current episode mild  
Eu331 [X]Recurrent depressive disorder, current episode moderate  
Eu332 [X]Recurrent depressive disorder, current episode severe without psychotic symptoms  
Eu334 [X]Recurrent depressive disorder, currently in remission  
Eu33y [X]Other recurrent depressive disorders  
Eu33z [X]Recurrent depressive disorder, unspecified  
Eu341 [X]Dysthymia  
E118. Seasonal affective disorder  
E135. Agitated depression  
E2B.. Depressive disorder NEC  
E2B1. Chronic depression  
E291. Prolonged depressive reaction  
E204. Neurotic depression reactive type  
E2B0. Postviral depression  
E112. Single major depressive episode  
E1120 Single major depressive episode, unspecified  
E1121 Single major depressive episode, mild  
E1122 Single major depressive episode, moderate  
E1123 Single major depressive episode, severe, without psychosis  
E1125 Single major depressive episode, partial or unspesied remission  
E1126 Single major depressive episode, in full remission  
E112z Single major depressive episode NOS  
E113. Recurrent major depressive episode  
E1130 Recurrent major depressive episodes, unspecified  
E1131 Recurrent major depressive episodes, mild  
E1132 Recurrent major depressive episodes, moderate  
E1133 Recurrent major depressive episodes, severe, no psychosis  
E1135 Recurrent major depressive episodes, partial/unspecified remission  
E1136 Recurrent major depressive episodes, in full remission  
E1137 Recurrent depression  
E113z Recurrent major depressive episode NOS

### ***Anxiety diagnoses***

Eu41. [X]Other anxiety disorders  
Eu410 [X]Panic disorder [episodic paroxysmal anxiety]  
Eu411 [X]Generalized anxiety disorder  
Eu413 [X]Other mixed anxiety disorders

Eu41y [X]Other specified anxiety disorders  
Eu41z [X]Anxiety disorder, unspecified  
E200. Anxiety states  
E2000 Anxiety state unspecified  
E2001 Panic disorder  
E2002 Generalised anxiety disorder  
E2004 Chronic anxiety  
E2005 Recurrent anxiety  
E200z Anxiety state NOS  
E202. Phobic disorders  
Eu40. Phobic anxiety disorder  
Eu930 Separation anxiety disorder of childhood  
Eu931 Phobic anxiety disorder of childhood  
Eu932 Social anxiety disorder of childhood

***Mixed depression and anxiety diagnoses***

E2003 Anxiety with depression  
Eu412 [X]Mixed anxiety and depressive disorder

***Depression symptoms***

1B17. Depressed  
1B1U. Symptoms of depression  
1BQ.. Loss of capacity for enjoyment  
1BT.. Depressed mood  
1BU.. Loss of hope for the future  
2257. O/E – depressed  
1BP.. Loss of interest

***Anxiety symptoms***

1B13. Anxiousness  
2258. O/E - anxious  
1B12. Nerves, nervousness  
R2y2. (D) nervousness  
2259. O/E nervous  
225J. O/E panic attack  
1B1V. C/O panic attack

**Drugs**

***Antidepressants***

d71.. *Amitriptyline hydrochloride*  
d72.. *Butriptyline - discontinued*  
d73.. *Clomipramine hydrochloride*  
d74.. *Desipramine hydrochloride*  
d75.. *Dosulepin Hydrochloride*  
d76.. *Doxepin*  
d77.. *Imipramine hydrochloride*  
d78.. *Ipindole*  
d79.. *Lofepamine*

d7a.. *Maprotiline hydrochloride*  
d7b.. *Mianserin hydrochloride*  
d7c.. *Nortriptyline*  
d7d.. *Protriptyline hydrochloride*  
d7e.. *Trazadone hydrochloride*  
d7f.. *Trimipramine*  
d7g.. *Viloxazine hydrochloride*  
d7h.. *Amoxapine*  
d81.. *Phenelzine*  
d83.. *Isocarboxazid*  
d84.. *Tranylcypromine*  
d85.. *Moclobemide*  
d91.. *Compound Antidepressants A-Z*  
da1.. *Flupentixol [Antidepressant]*  
da2.. *Tryptophan*  
da3.. *Fluvoxamine Maleate*  
da4.. *Fluoxetine hydrochloride*  
da5.. *Sertraline hydrochloride*  
da6.. *Paroxetine hydrochloride*  
da7.. *Venlafaxine*  
da9.. *Citalopram*  
daA.. *Reboxetine*  
daB.. *Mirtazapine*  
daC.. *Escitalopram*  
daD.. *Agomelatine*  
gde.. *Duloxetine*

### **Hypnotics**

d11.. *Chloral hydrate*  
d12.. *Clomethiazole edisylate (hypnotic)*  
d13.. *Dichloralphenazone - discontinued*  
d14.. *Flumtrazepam - discontinued*  
d15.. *Flurazepam*  
d16.. *Loprazolam*  
d17.. *Lormetazepam*  
d18.. *Nitrazepam*  
d1a.. *Temazepam (hypnotic)*  
d1b.. *Triazolam - discontinued*  
d1c.. *Triclofos sodium*  
d1d.. *Zopiclone*  
d1f.. *Zolpidem*  
d1g.. *Zaleplon*  
d1h.. *Melatonin*  
d1i.. *Dexmedetomidine*

### **Anxiolytics**

d21.. *Diazepam*  
d22.. *Alprazolam*

d23.. Bromazepam  
d24.. Chlordiazepoxide  
d25.. Chlormezanone  
d26.. Clobazam  
d27.. Clorazepate dipotassium  
d28.. Hydroxyzine hcl (anxiolytic)  
d29.. Ketazolam - discontinued  
d2a.. Lorazepam (anxiolytic)  
d2b.. Medazepam - discontinued  
d2c.. Meprobamate  
d2d.. Oxazepam  
d2f.. Buspirone hydrochloride  
d2g.. Flumazenil
